# Supplementary material for: Cooperative effects of Schiff base binuclear zinc complexes on the synthesis of aliphatic and semi-aromatic polyesters
Source: Royal Society of Chemistry journal article supplement (doi:10.1039/d3dt02396f), 2023-01-01
Supplement: d3dt02396f1.pdf [file d3dt02396f1.pdf]

## Supporting information

### Cooperative effects in Schiff base binuclear zinc complexes for the synthesis of aliphatic and semi-aromatic polyesters.

Federica Santulli,<sup>§</sup> Federica Tufano,<sup>§</sup> Mariachiara Cozzolino, Ilaria D'Auria, Maria Strianese, Mina Mazzeo and Marina Lamberti\*

<sup>§</sup>These authors equally contributed to the paper.

Department of Chemistry and Biology “Adolfo Zambelli” University of Salerno, via Giovanni Paolo II, 132. 84084 Fisciano (SA) Italy

E-mail: mlamberti@unisa.it

|                                                                                                                                                                                                                                                                                                                                                                                     |    |
|-------------------------------------------------------------------------------------------------------------------------------------------------------------------------------------------------------------------------------------------------------------------------------------------------------------------------------------------------------------------------------------|----|
| <b>Characterization of complexes</b> .....                                                                                                                                                                                                                                                                                                                                          | 2  |
| <b>Figure S1.</b> <sup>1</sup> H NMR spectrum (C <sub>6</sub> D <sub>6</sub> , 298 K, 400 MHz) of complex <b>1</b> .....                                                                                                                                                                                                                                                            | 3  |
| <b>Figure S2.</b> <sup>1</sup> H NMR spectrum (C <sub>6</sub> D <sub>6</sub> , 298 K, 400 MHz) of complex <b>2</b> .....                                                                                                                                                                                                                                                            | 4  |
| <b>Figure S3.</b> <sup>1</sup> H NMR spectrum (C <sub>6</sub> D <sub>6</sub> , 298 K, 400 MHz) of complex <b>3</b> .....                                                                                                                                                                                                                                                            | 5  |
| <b>DOSY-NMR experiments details</b> .....                                                                                                                                                                                                                                                                                                                                           | 6  |
| <b>Figure S4.</b> DOSY spectrum (C <sub>6</sub> D <sub>6</sub> , 298 K, 600 MHz) of complex <b>3</b> (D = 5.76 10 <sup>-10</sup> m <sup>2</sup> /s) in the presence of TMS as standard (D = 1.56 10 <sup>-9</sup> m <sup>2</sup> /s). .....                                                                                                                                         | 6  |
| <b>Figure S5.</b> DOSY spectrum (C <sub>6</sub> D <sub>6</sub> , 298 K, 600 MHz) of complex <b>2</b> (D = 4.3 10 <sup>-10</sup> m <sup>2</sup> /s) in the presence of TMSS as standard (D = 8.7 10 <sup>-10</sup> m <sup>2</sup> /s). (Molecular weight of TMSS = 320.84 Da; estimated mass for complex <b>2</b> = 1300; Molecular weight for complex <b>2</b> = 1200.67 Da). ..... | 7  |
| <b>Ring-Opening Polymerization of lactides</b> .....                                                                                                                                                                                                                                                                                                                                | 8  |
| <b>Table S1.</b> Ring-opening polymerization of L-lactide by complexes 1-3 .....                                                                                                                                                                                                                                                                                                    | 8  |
| <b>Table S2.</b> Polymerization of L-LA by complex <b>2</b> .....                                                                                                                                                                                                                                                                                                                   | 9  |
| <b>Figure S6.</b> Molecular weights and molecular weights distribution (determined by GPC analysis) in function of the conversion for the polymerization experiment detailed in Table S2 (L-LA) <sub>0</sub> : <b>[2]</b> <sub>0</sub> = 200:2 in THF as solvent). .....                                                                                                            | 9  |
| <b>Table S3.</b> Polymerization of L-LA by complex <b>2</b> and <sup>i</sup> PrOH .....                                                                                                                                                                                                                                                                                             | 10 |
| <b>Figure S7.</b> Molecular weights and molecular weights distribution (determined by GPC analysis) in function of the conversion for the polymerization experiment detailed in Table S3 (L-LA) <sub>0</sub> : <b>[2]</b> <sub>0</sub> : <sup>i</sup> PrOH <sub>0</sub> = 200:2:2 in THF as solvent). .....                                                                         | 10 |
| <b>Figure S8.</b> <sup>1</sup> H NMR spectrum (C <sub>6</sub> D <sub>6</sub> , 298 K, 400 MHz) of the reaction mixture composed by complex <b>2</b> and 2 equivalents of isopropanol. ....                                                                                                                                                                                          | 11 |

|                                                                                                                                                                                                            |    |
|------------------------------------------------------------------------------------------------------------------------------------------------------------------------------------------------------------|----|
| <b>Figure S9.</b> <sup>1</sup> H NMR spectrum (600 MHz, CDCl <sub>3</sub> , 298K) of a PLA sample (run 10 in Table 1).                                                                                     | 11 |
| <b>Figure S10.</b> MALDI-FT-ICR spectrum of a PLA sample (run 9, Table 1).                                                                                                                                 | 12 |
| <b>Table S4.</b> Ring-opening polymerization of <i>rac</i> -lactide by complexes <b>1</b> and <b>2</b> .                                                                                                   | 12 |
| <b>Figure S11.</b> Methine region of the homonuclear decoupled <sup>1</sup> H NMR spectrum (CDCl <sub>3</sub> , 298K, 400K) of P( <i>rac</i> -LA) (run S1 in Table S4).                                    | 12 |
| <b>Statistical analysis of a PLA sample obtained by <i>rac</i>-LA.</b>                                                                                                                                     | 13 |
| <b>Table S5.</b> Tetrad probabilities based on Bernoullian Statistics (Th) and experimental values (Exp) as obtained by NMR analysis of polymeric sample obtained in entry S1 of Table S4.                 | 13 |
| <b>Table S6.</b> Tetrad probabilities based on Enantiomorphic Site Control Statistics (Th) and experimental values (Exp) as obtained by NMR analysis of polymeric sample obtained in entry S1 of Table S4. | 13 |
| <b>Table S7.</b> Ring-opening polymerization of L-lactide by complex <b>2</b> , using different solvents.                                                                                                  | 14 |
| <b>Ring-Opening Polymerization of <math>\epsilon</math>-caprolactone</b>                                                                                                                                   | 15 |
| <b>Figure S12.</b> <sup>1</sup> H NMR spectrum (600 MHz, CDCl <sub>3</sub> , 298K) of PCL (run 17 in Table 2).                                                                                             | 15 |
| <b>Figure S13.</b> MALDI-FT-ICR spectrum of PCL (run 17, Table 2).                                                                                                                                         | 15 |
| <b>Ring-Opening COPolymerization of phthalic anhydride and cyclohexene oxide</b>                                                                                                                           | 16 |
| <b>Figure S14.</b> <sup>1</sup> H NMR spectrum (300 MHz, CDCl <sub>3</sub> , 298K) of a sampling of the reaction mixture during a CHO/PA ROCOP (run 20 in Table 3).                                        | 16 |
| <b>Figure S15.</b> <sup>1</sup> H NMR spectrum (600 MHz, CDCl <sub>3</sub> , 298K) of P(CHO-PA) (run 24 in Table 3).                                                                                       | 16 |

## Characterization of complexes

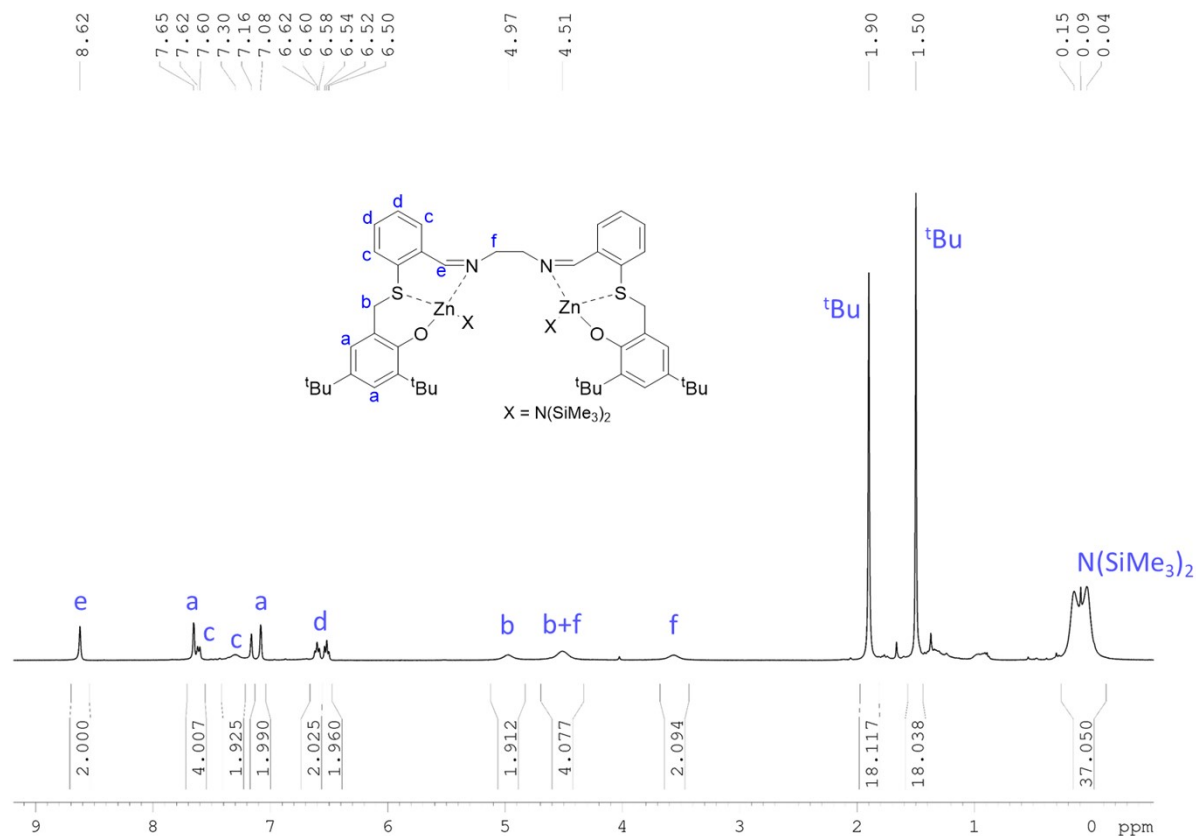

**Figure S1.**  $^1\text{H}$  NMR spectrum ( $\text{C}_6\text{D}_6$ , 298 K, 400 MHz) of complex **1**

$^1\text{H}$  NMR (400 MHz,  $\text{C}_6\text{D}_6$ , 298 K):  $\delta$  8.62 (s, 2H, CH=N), 7.63 (d,  $J=2.53$  Hz, 2H, Ar-H), 7.60 (d,  $J=7.88$  Hz, 2H, Ar-H), 7.29 (br, 2H, Ar-H), 7.08 (d,  $J=2.48$  Hz, 2H, Ar-H), 6.58 (t, 2H, Ar-H), 6.49 (t, 2H, Ar-H), 4.98 (br, 2H, N-CH<sub>2</sub>), 4.51 (br, 4H, S-CH<sub>2</sub>), 3.57 (br, 2H, N-CH<sub>2</sub>), 1.90 (s, 18H, CCH<sub>3</sub>), 1.50 (s, 18H, CCH<sub>3</sub>), 0.14 (br, 36H, Si(CH<sub>3</sub>)<sub>3</sub>).

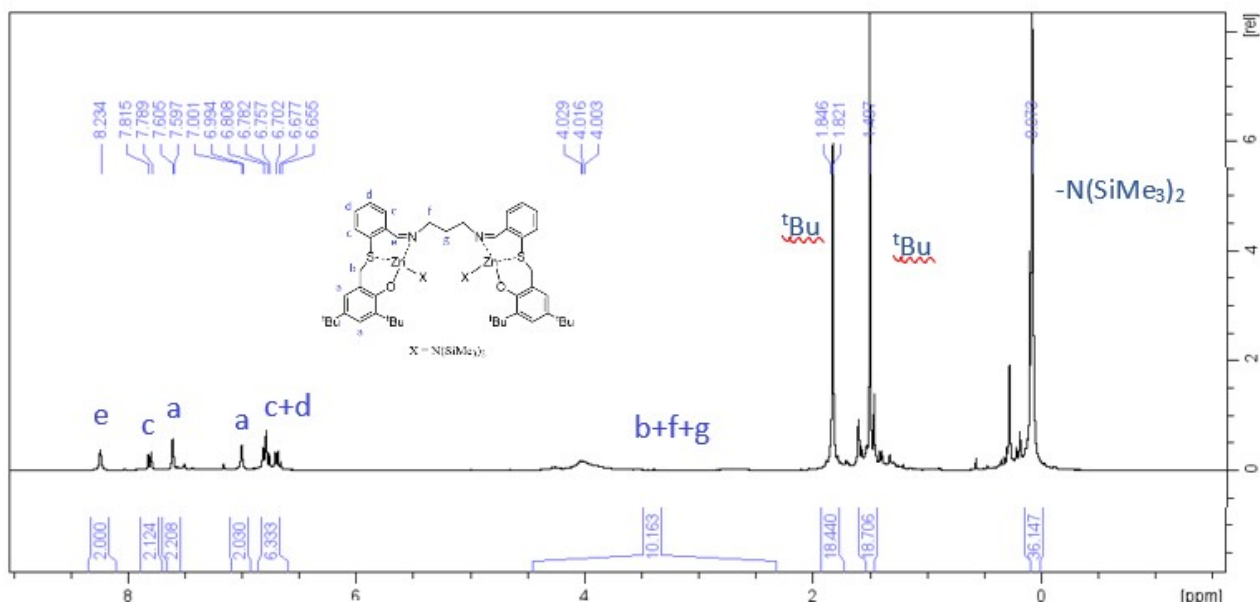

**Figure S2.**  $^1\text{H}$  NMR spectrum ( $\text{C}_6\text{D}_6$ , 298 K, 400 MHz) of complex **2**

$^1\text{H}$  NMR (400 MHz,  $\text{C}_6\text{D}_6$ , 298 K):  $\delta$  8.24 (s, 2H, CH=N), 7.80 (d,  $J=7.92$  Hz, 2H, Ar-H), 7.60 (d,  $J=2.50$  Hz, 2H, Ar-H), 6.80 (d,  $J=2.15$  Hz, 2H, Ar-H), 6.76 (m, 4H, Ar-H), 6.66 (t, 2H, Ar-H), 4.25 (br, 4H, S- $\text{CH}_2$ ), 4.00 (br, 4H, N- $\text{CH}_2$ ), 1.82 (s, 18H,  $\text{CCH}_3$ ), 1.50 (s, 18H,  $\text{CCH}_3$ ), 0.10 (s, 36H,  $\text{Si}(\text{CH}_3)_3$ ).

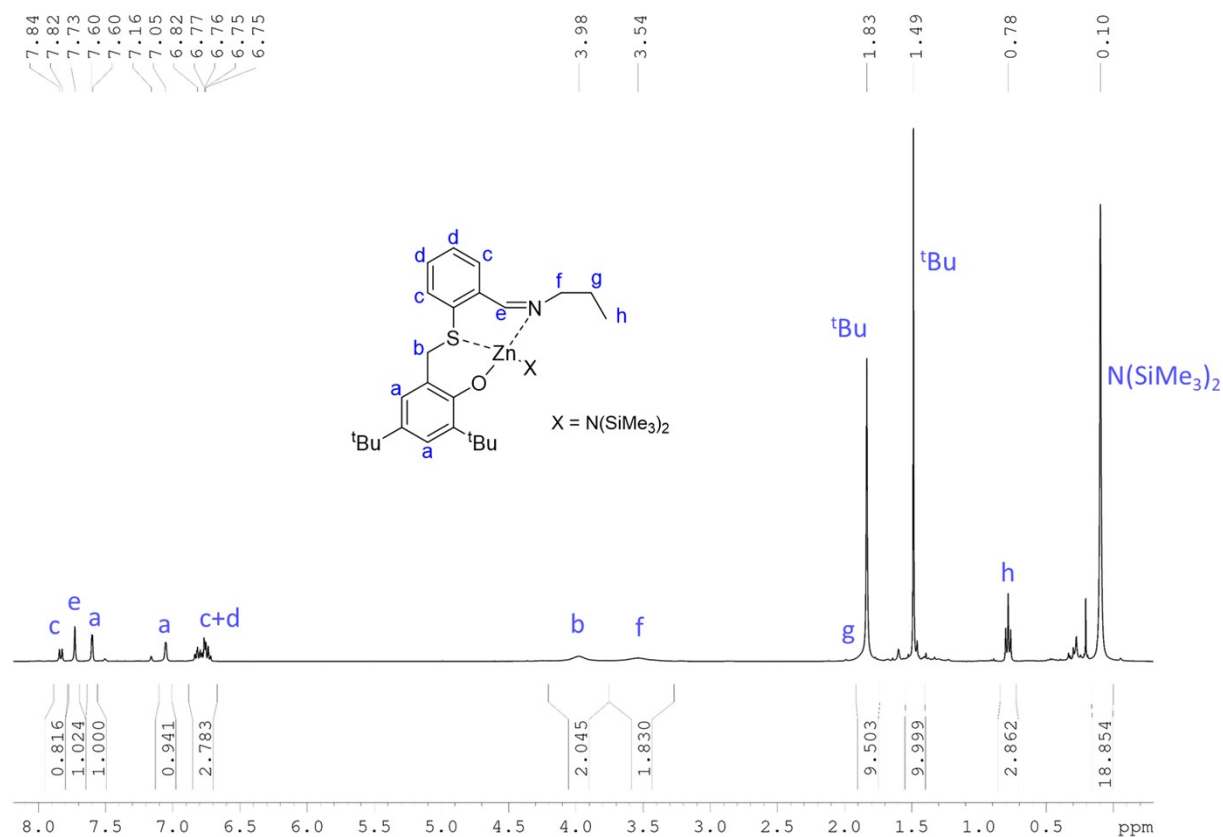

**Figure S3.** <sup>1</sup>H NMR spectrum (C<sub>6</sub>D<sub>6</sub>, 298 K, 400 MHz) of complex **3**

<sup>1</sup>H NMR (400 MHz, C<sub>6</sub>D<sub>6</sub>, 298 K): δ 7.84 (d, J = 7.90 Hz 2H, Ar-H), 7.73 (s, 1H, CH=N), 7.59 (s, 1H, Ar-H), 7.05 (s, 1H, Ar-H), 6.75 (m, 3H, Ar-H), 3.98 (br, 2H, S-CH<sub>2</sub>), 3.54 (br, 2H, N-CH<sub>2</sub>), 1.83 (s, 9H, CCH<sub>3</sub>), 1.49 (s, 9H, CCH<sub>3</sub>), 0.78 (t, 3H, CH<sub>3</sub>), 0.10 (s, 18H, Si(CH<sub>3</sub>)<sub>3</sub>).

## DOSY-NMR experiments details

A measurement of diffusion has been carried out by observing the attenuation of the NMR signals during a pulsed field gradient experiment using the double stimulated echo pulse sequence. In particular, 2D DOSY PGSE NMR spectra were performed on a Bruker Avance 600 spectrometer at 298 K without spinning. Tetramethylsilane (TMS) was added as the internal standard. The dependence of the resonance intensity ( $I$ ) on the gradient strength ( $G$ ) is described by the following equation:

$$I(G) = I_0 \exp[-D \gamma^2 G^2 \delta^2 (\Delta - \delta/3)]$$

where  $I$  is the observed intensity (attenuated signal intensity),  $I_0$  is the reference intensity (unattenuated signal intensity),  $D$  is the diffusion coefficient,  $\gamma$  is the nucleus gyromagnetic ratio,  $G$  is the gradient strength,  $\delta$  is the gradient duration, and  $\Delta$  is the diffusion delay. The parameters  $\delta$  and  $\Delta$  were kept constant during the experiments (1800  $\mu$ s and 0.15 s, respectively) whereas  $G$  varied from 5 to 95% in 100 steps.

A nonlinear regression on  $I$  and  $G^2$  data gave the coefficients  $D$  for the samples and the corresponding internal standard signals ( $D_{\text{sample}}$  and  $D_{\text{TMS}}$ , respectively).

The molecular masses in solution ( $MM$ ) were simply estimated using Graham's law of diffusion:  $D = K(T/MM)^{1/2}$ , where the constant  $K$  depends on geometric factor. By assuming the same  $K$  for both species in solution and a constant temperature, the relative diffusion rate of the sample and the TMS is given by

$$D_{\text{sample}}/D_{\text{TMS}} = (MM_{\text{TMS}}/MM_{\text{sample}})^{1/2}$$

This allows the calculation of an unknown molecular mass. This method is useful when a highly accurate value is not required for the molecular mass.

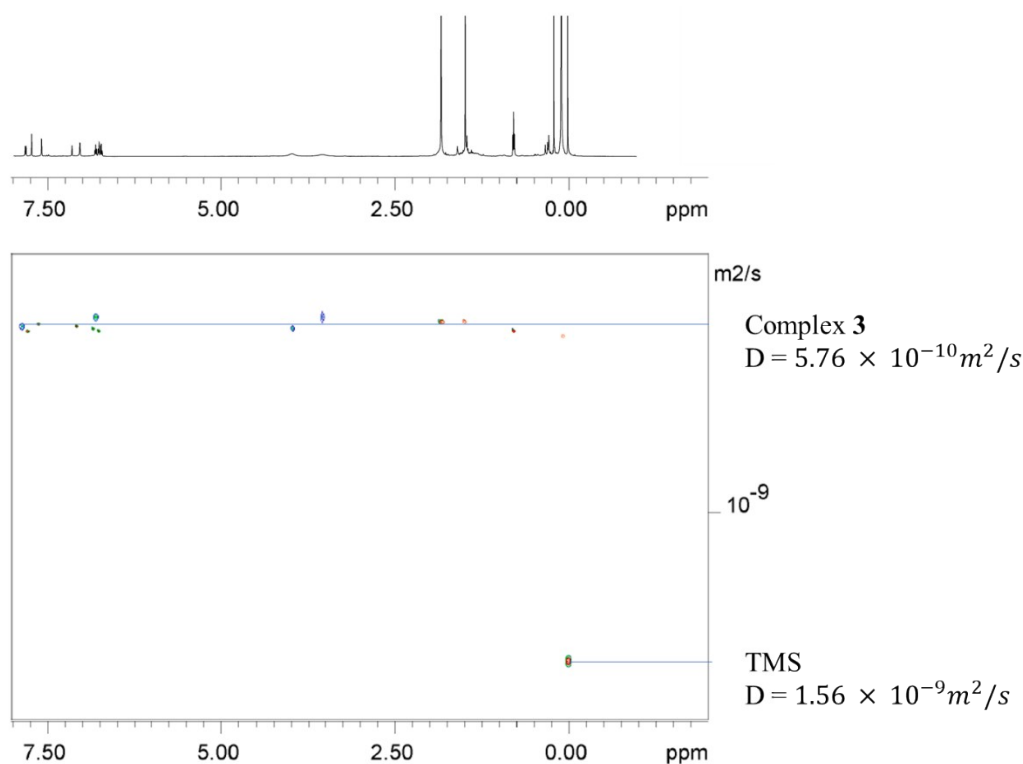

**Figure S4.** DOSY spectrum ( $C_6D_6$ , 298 K, 600 MHz) of complex 3 ( $D = 5.76 \cdot 10^{-10} m^2/s$ ) in the presence of TMS as standard ( $D = 1.56 \cdot 10^{-9} m^2/s$ ).

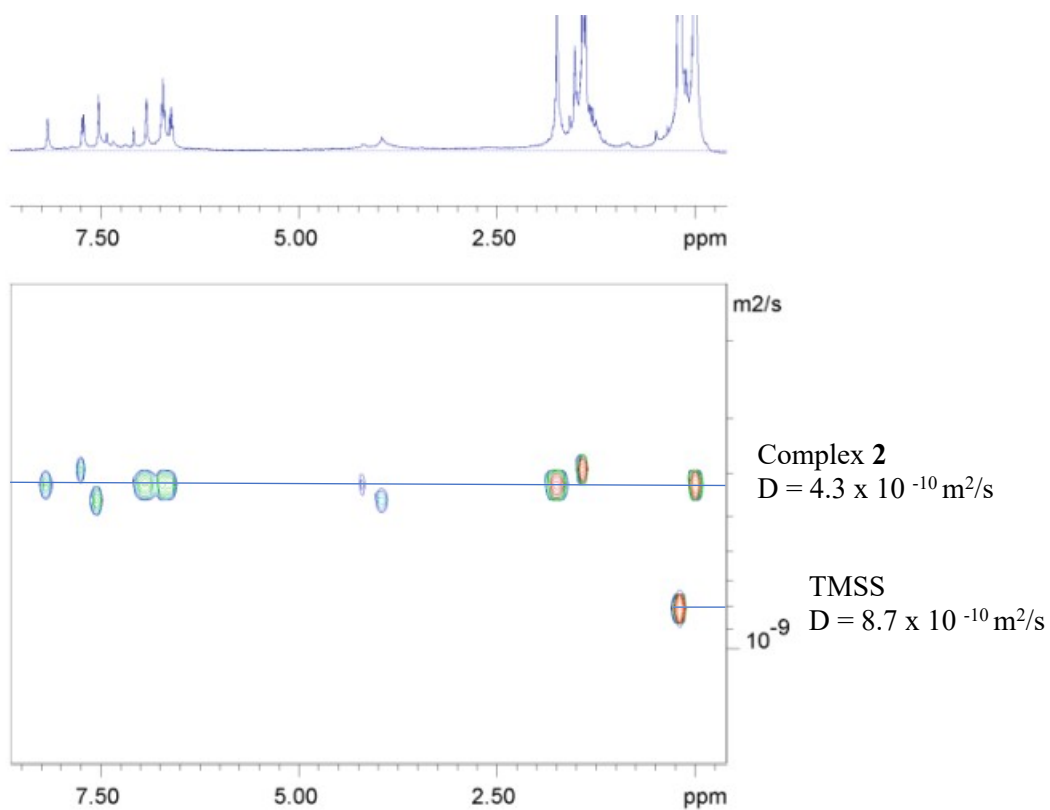

**Figure S5.** DOSY spectrum ( $\text{C}_6\text{D}_6$ , 298 K, 600 MHz) of complex **2** ( $D = 4.3 \times 10^{-10} \text{ m}^2/\text{s}$ ) in the presence of TMSS as standard ( $D = 8.7 \times 10^{-10} \text{ m}^2/\text{s}$ ). (Molecular weight of TMSS = 320.84 Da; estimated mass for complex **2** = 1300; Molecular weight for complex **2** = 1200.67 Da).

## Ring-Opening Polymerization of lactides

**Table S1.** Ring-opening polymerization of L-lactide by complexes 1-3

| <sup>a</sup> Run | Cat | [LA] <sub>0</sub> /[Zn] <sub>0</sub> /<br>[iPrOH] <sub>0</sub> | Temp<br>(°C) | Time<br>(h) | <sup>b</sup> Conv<br>(%) | <sup>c</sup> M <sub>n</sub> <sup>th</sup><br>(×10 <sup>3</sup> ) | <sup>d</sup> M <sub>n</sub> <sup>GPC</sup><br>(×10 <sup>3</sup> ) | <sup>d</sup> Đ |
|------------------|-----|----------------------------------------------------------------|--------------|-------------|--------------------------|------------------------------------------------------------------|-------------------------------------------------------------------|----------------|
| 1                | 1   | 200:2:0                                                        | 25           | 2           | 0                        |                                                                  |                                                                   |                |
|                  |     |                                                                |              | 4           | 5                        |                                                                  |                                                                   |                |
|                  |     |                                                                |              | 7           | 11                       |                                                                  |                                                                   |                |
|                  |     |                                                                |              | 24          | 76                       | 21.9                                                             | 21.1                                                              | 1.17           |
| 2                | 2   | 200:2:0                                                        | 25           | 2           | 0                        |                                                                  |                                                                   |                |
|                  |     |                                                                |              | 4           | 7                        |                                                                  |                                                                   |                |
|                  |     |                                                                |              | 7           | 20                       |                                                                  |                                                                   |                |
|                  |     |                                                                |              | 24          | 69                       | 19.9                                                             | 21.0                                                              | 1.27           |
| 3                | 3   | 100:1:0                                                        | 25           | 2           | 8                        |                                                                  |                                                                   |                |
|                  |     |                                                                |              | 4           | 20                       |                                                                  |                                                                   |                |
|                  |     |                                                                |              | 7           | 40                       |                                                                  |                                                                   |                |
|                  |     |                                                                |              | 9           | 61                       | 8.8                                                              | 34.4                                                              | 1.34           |
| 4                | 1   | 200:2:0                                                        | 60           | 2           | 57                       |                                                                  |                                                                   |                |
|                  |     |                                                                |              | 3           | 74                       |                                                                  |                                                                   |                |
|                  |     |                                                                |              | 4           | 86                       | 24.8                                                             | 28.8                                                              | 1.24           |
| 5                | 2   | 200:2:0                                                        | 60           | 2           | 85                       | 24.6                                                             | 24.7                                                              | 1.23           |
| 6                | 3   | 100:1:0                                                        | 60           | 0.5         | 50                       |                                                                  |                                                                   |                |
|                  |     |                                                                |              | 1           | 82                       | 11.8                                                             | 31.3                                                              | 1.47           |

General conditions: All reactions were carried out in 1 mL of THF. [1]<sub>0</sub>-[2]<sub>0</sub> = 5.0 10<sup>-6</sup> mol; [3]<sub>0</sub> = 1.0 10<sup>-5</sup> mol, (i.e. [Zn]<sub>0</sub> = 1.0 10<sup>-2</sup> M). [L-LA] = 1.0 M). <sup>a</sup>Determined by <sup>1</sup>H NMR spectral data. <sup>b</sup>M<sub>n</sub><sup>th</sup> (g mol<sup>-1</sup>) 144,13 x ([L-LA]<sub>0</sub>/[Cat]<sub>0</sub>) x L-LA conversion (for entries 1-6). <sup>c</sup>Experimental M<sub>n</sub> (in g mol<sup>-1</sup>) and M<sub>w</sub>/M<sub>n</sub> (Đ) values were determined by GPC in THF using polystyrene standards and corrected using the factor of 0.58.



**Table S2.** Polymerization of L-LA by complex **2**

| Time (h) | <sup>a</sup> Conv. (%) | <sup>b</sup> $M_n^{\text{th}}$<br>( $\times 10^3$ ) | <sup>c</sup> $M_n^{\text{GPC}}$<br>( $\times 10^3$ ) | <sup>c</sup> $\bar{D}$ |
|----------|------------------------|-----------------------------------------------------|------------------------------------------------------|------------------------|
| 6        | 20                     | 5.8                                                 | 8.8                                                  | 1.18                   |
| 16       | 70                     | 20.2                                                | 23.4                                                 | 1.20                   |
| 20       | 80                     | 23.1                                                | 26.2                                                 | 1.24                   |
| 24       | 84                     | 24.2                                                | 26.2                                                 | 1.33                   |

The polymerization was carried out in 1 mL of THF.  $[2]_0 = 5.0 \times 10^{-6}$  mol.  $[L\text{-LA}] = 1.0$  M.  $[L\text{-LA}]_0:[2]_0:[i\text{PrOH}]_0 = 200:2:0$ . <sup>a</sup>Determined by <sup>1</sup>H-NMR spectral data. <sup>b</sup> $M_n^{\text{th}}$  ( $\text{g mol}^{-1}$ ) =  $144.13 \times ([L\text{-LA}]_0/[2]_0) \times \text{L-LA conversion}$ . <sup>c</sup> $M_n^{\text{GPC}}$  (in  $\text{g mol}^{-1}$ ) and  $M_w/M_n$  ( $\bar{D}$ ) values were determined by GPC in THF using polystyrene standards and corrected using the factor of 0.58.

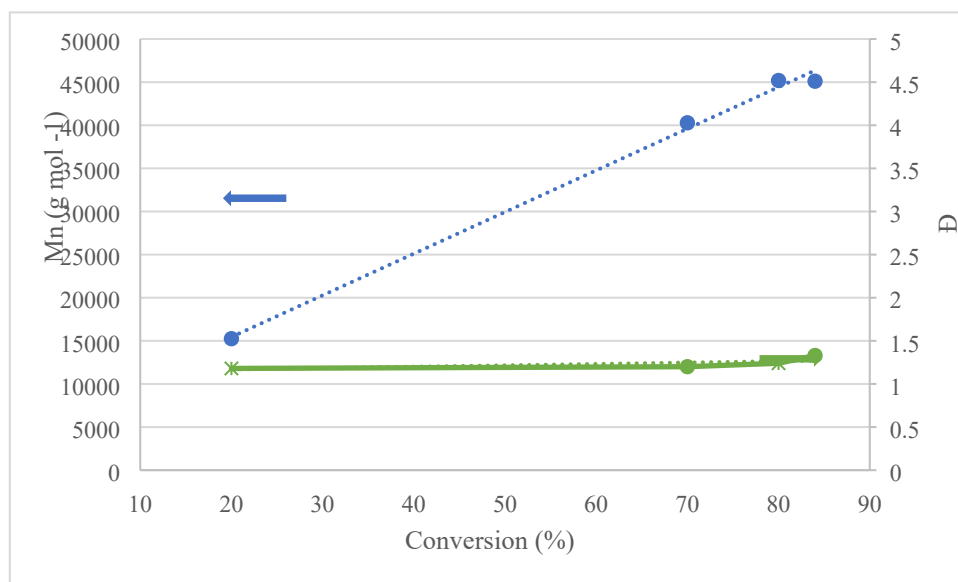**Figure S6.** Molecular weights and molecular weights distribution (determined by GPC analysis) in function of the conversion for the polymerization experiment detailed in Table S2 ( $[L\text{-LA}]_0:[2]_0 = 200:2$  in THF as solvent).

**Table S3.** Polymerization of L-LA by complex **2** and *i*PrOH

| Time (h) | <sup>a</sup> Conv. (%) | <sup>b</sup> $M_n^{\text{th}}$<br>(x 10 <sup>3</sup> ) | <sup>c</sup> $M_n^{\text{GPC}}$<br>(x 10 <sup>3</sup> ) | <sup>c</sup> $\mathcal{D}$ |
|----------|------------------------|--------------------------------------------------------|---------------------------------------------------------|----------------------------|
| 0.5      | 32                     | 4.6                                                    | 2.5                                                     | 1.15                       |
| 1        | 42                     | 6.1                                                    | 4.1                                                     | 1.10                       |
| 1.5      | 55                     | 7.9                                                    | 5.3                                                     | 1.17                       |
| 2        | 69                     | 9.9                                                    | 7.0                                                     | 1.18                       |

The polymerization experiment was carried out in 1 mL of THF.  $[\mathbf{2}]_0 = 5.0 \times 10^{-6}$  mol.  $[\text{L-LA}] = 1.0$  M.  $[\text{L-LA}]_0:[\mathbf{2}]_0:[i\text{PrOH}]_0 = 200:2:2$ . <sup>a</sup>Determined by <sup>1</sup>H-NMR spectral data. <sup>b</sup> $M_n^{\text{th}}$  (g mol<sup>-1</sup>) = 144.13 x  $([\text{L-LA}]_0/[i\text{PrOH}]_0)$  x L-LA conversion. <sup>c</sup> $M_n^{\text{GPC}}$  (in g mol<sup>-1</sup>) and  $M_w/M_n$  ( $\mathcal{D}$ ) values were determined by GPC in THF using polystyrene standards and corrected using the factor of 0.58.

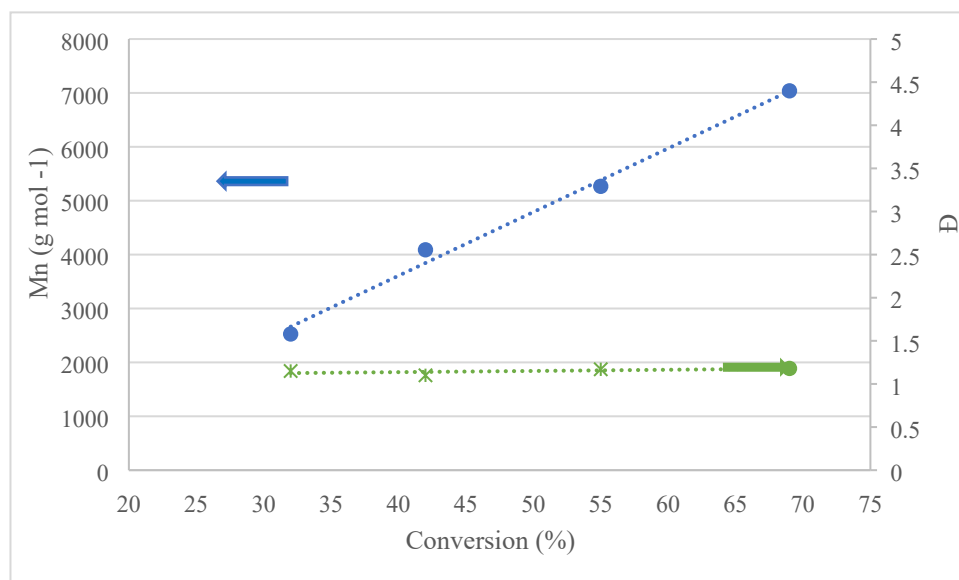**Figure S7.** Molecular weights and molecular weights distribution (determined by GPC analysis) in function of the conversion for the polymerization experiment detailed in Table S3 ( $[\text{L-LA}]_0:[\mathbf{2}]_0:[i\text{PrOH}]_0 = 200:2:2$  in THF as solvent).

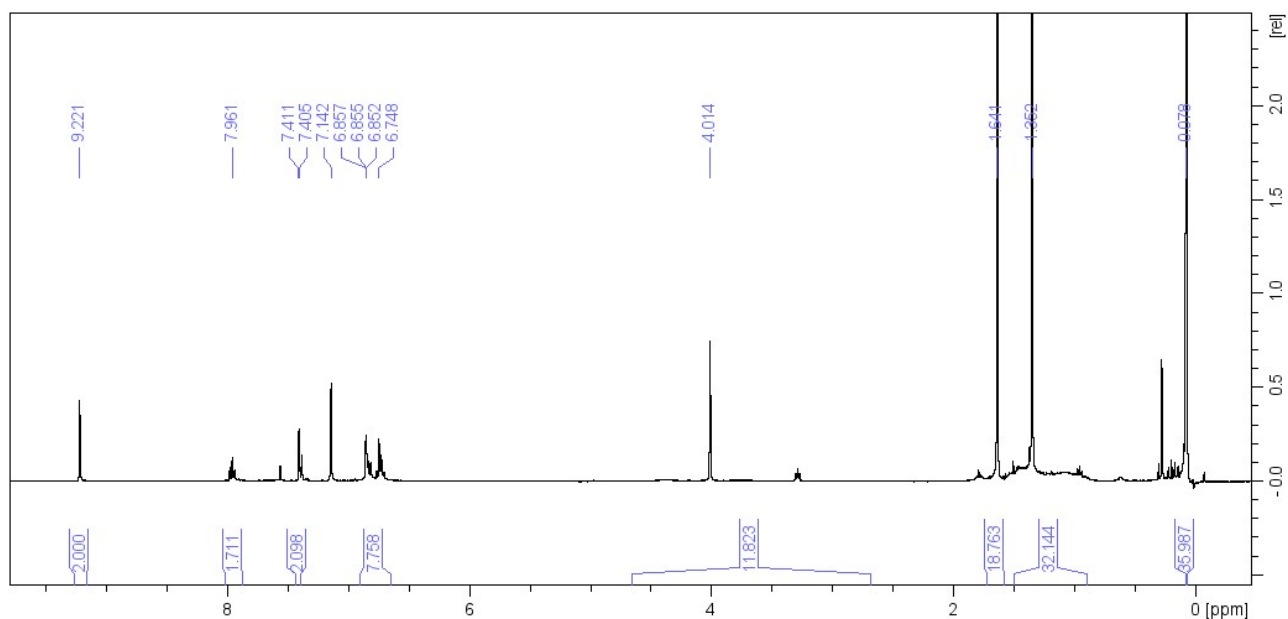

**Figure S8.** <sup>1</sup>H NMR spectrum (C<sub>6</sub>D<sub>6</sub>, 298 K, 400 MHz) of the reaction mixture composed by complex **2** and 2 equivalents of isopropanol.

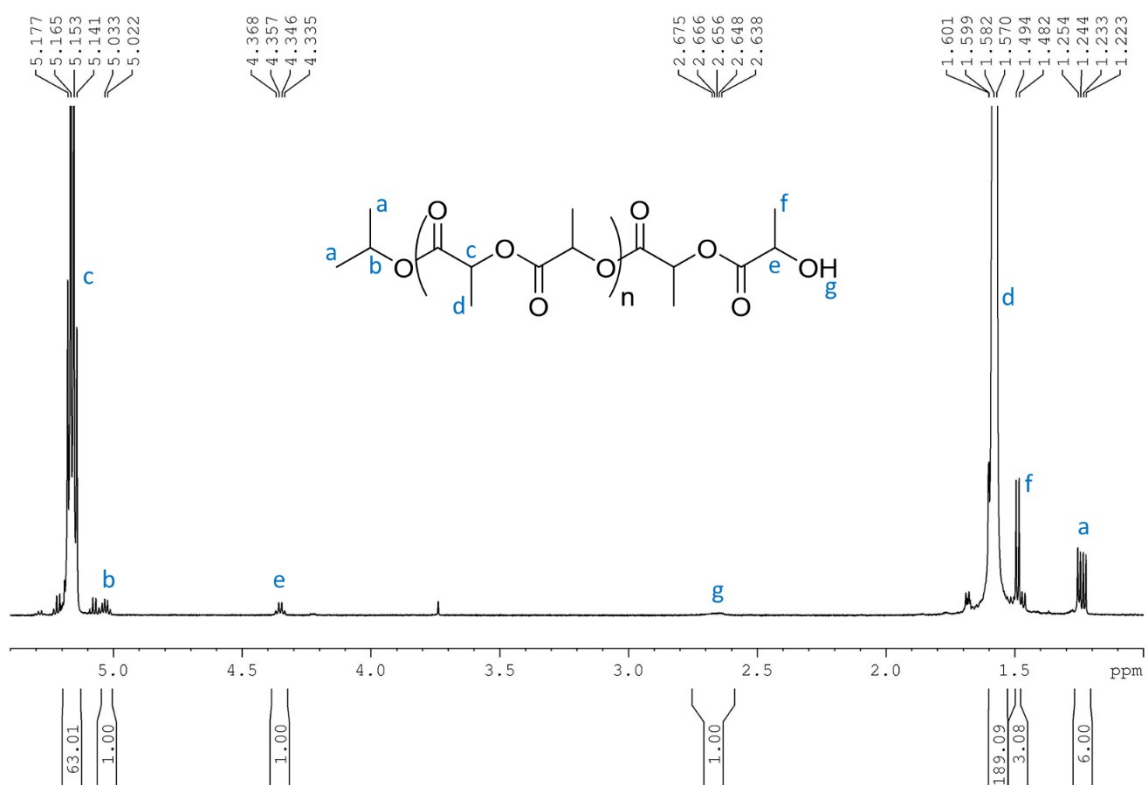

**Figure S9.** <sup>1</sup>H NMR spectrum (600 MHz, CDCl<sub>3</sub>, 298K) of a PLA sample (run 10 in Table 1).

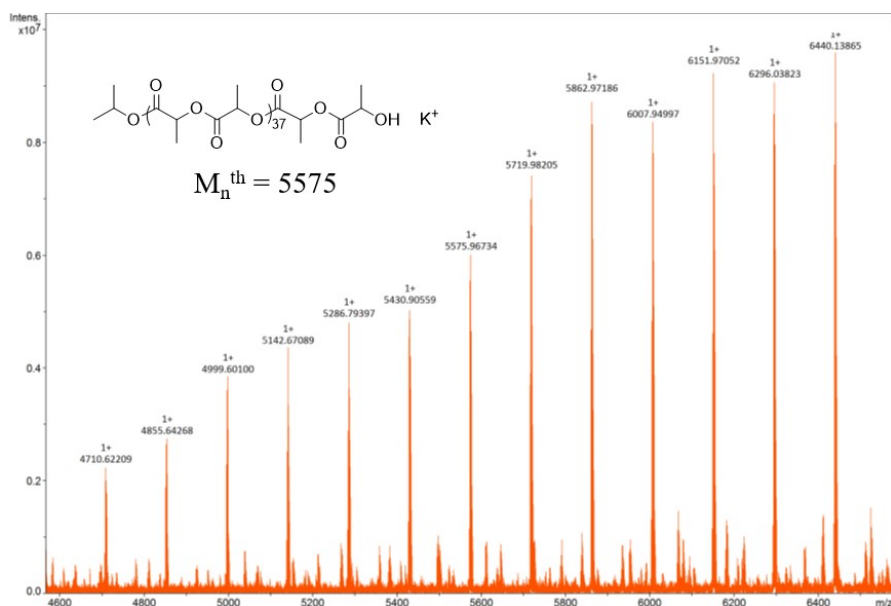

**Figure S10.** MALDI-FT-ICR spectrum of a PLA sample (run 10, Table 1).

**Table S4.** Ring-opening polymerization of *rac*-lactide by complexes **1** and **2**.

| <sup>a</sup> Run | Cat      | [L-LA] <sub>0</sub> /[Zn] <sub>0</sub> /<br>[ <sup>i</sup> PrOH] <sub>0</sub> | <sup>b</sup> Conv<br>(%) | <sup>c</sup> M <sub>n</sub> <sup>th</sup><br>(×10 <sup>3</sup> ) | <sup>d</sup> M <sub>n</sub> <sup>GPC</sup><br>(×10 <sup>3</sup> ) | <sup>d</sup> Đ |
|------------------|----------|-------------------------------------------------------------------------------|--------------------------|------------------------------------------------------------------|-------------------------------------------------------------------|----------------|
| S1               | <b>1</b> | 200:2:0                                                                       | 66                       | 19.0                                                             | 16.3                                                              | 1.41           |
| S2               | <b>2</b> | 200:2:0                                                                       | 77                       | 22.2                                                             | 25.6                                                              | 1.43           |

<sup>a</sup>Reactions were carried out in 1 mL of solvent (THF), complexes **1-2** = 5.0 10<sup>-6</sup> mol; *rac*-lactide was used as monomer. Temperature = 25 °C; time = 24 h. <sup>b</sup>Determined by <sup>1</sup>H NMR spectral data. <sup>c</sup>M<sub>n</sub><sup>th</sup> (g mol<sup>-1</sup>) = 144,13 x ([LA]<sub>0</sub>/[<sup>i</sup>PrOH]<sub>0</sub>) x LA conversion. <sup>d</sup>Experimental M<sub>n</sub> (in g mol<sup>-1</sup>) and M<sub>w</sub>/M<sub>n</sub> (Đ) values were determined by GPC in THF using polystyrene standards and corrected using the factor of 0.58.

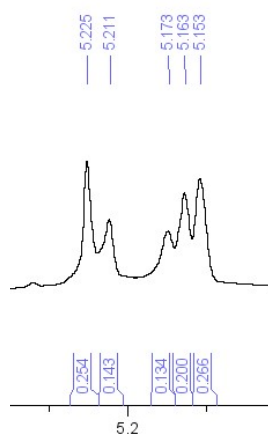

**Figure S11.** Methine region of the homonuclear decoupled <sup>1</sup>H NMR spectrum (CDCl<sub>3</sub>, 298K, 400K) of P(*rac*-LA) (run S1 in Table S4).

## Statistical analysis of a PLA sample obtained by *rac*-LA

**Table S5.** Tetrad probabilities based on Bernoullian Statistics (Th) and experimental values (Exp) as obtained by NMR analysis of polymeric sample obtained in entry S1 of Table S4.

| Tetrad          | Formula               | Th    | Exp   |
|-----------------|-----------------------|-------|-------|
| [ <i>rrmm</i> ] | $P_m^2/2$             | 0.254 | 0.254 |
| [ <i>rrmm</i> ] | $P_r P_m/2$           | 0.102 | 0.143 |
| [ <i>mrrr</i> ] | $P_r P_m/2$           | 0.102 | 0.134 |
| [ <i>mmmm</i> ] | $P_r^2 + P_r P_m/2$   | 0.185 | 0.200 |
| [ <i>mrrm</i> ] | $(P_m^2 + P_r P_m)/2$ | 0.356 | 0.266 |

**Table S6.** Tetrad probabilities based on Enantiomorphic Site Control Statistics (Th) and experimental values (Exp) as obtained by NMR analysis of polymeric sample obtained in entry S1 of Table S4.

| Tetrad          | Formula                                                 | Th    | Exp   |
|-----------------|---------------------------------------------------------|-------|-------|
| [ <i>rrmm</i> ] | $[\alpha^2(1-\alpha) + \alpha(1-\alpha)^2]/2$           | 0.113 | 0.254 |
| [ <i>rrmm</i> ] | $[\alpha^2(1-\alpha) + \alpha(1-\alpha)^2]/2$           | 0.113 | 0.143 |
| [ <i>mrrr</i> ] | $[\alpha^2(1-\alpha) + \alpha(1-\alpha)^2]/2$           | 0.113 | 0.134 |
| [ <i>mmmm</i> ] | $[\alpha^2 + (1-\alpha)^2 + \alpha^3 + (1-\alpha)^3]/2$ | 0.435 | 0.200 |
| [ <i>mrrm</i> ] | $[\alpha(1-\alpha) + \alpha(1-\alpha)]/2$               | 0.226 | 0.266 |

**Table S7.** Ring-opening polymerization of L-lactide by complex **2**, using different solvents.

| <sup>a</sup> Run | Solvent<br>(V, mL)  | Temp<br>(°C) | Time<br>(h) | <sup>b</sup> Conv<br>(%) |
|------------------|---------------------|--------------|-------------|--------------------------|
| 2                | THF<br>(1 mL)       | 25           | 24          | 69                       |
| S3               | DCM<br>(1 mL)       | 25           | 24          | 74                       |
| 5                | THF<br>(1 mL)       | 60           | 2           | 85                       |
| S4               | Toluene<br>(1 mL)   | 60           | 1           | 36                       |
|                  |                     |              | 2           | 59                       |
| S5               | Toluene<br>(2.5 mL) | 60           | 1           | 24                       |
|                  |                     |              | 2           | 37                       |
|                  |                     |              | 4           | 63                       |
|                  |                     |              | 6           | 77                       |
| S6               | THF<br>(2.5 mL)     | 60           | 1           | 20                       |
|                  |                     |              | 2           | 39                       |
|                  |                     |              | 4           | 57                       |
|                  |                     |              | 6           | 75                       |

<sup>a</sup>All reactions were carried out with complex **2** =  $5.0 \cdot 10^{-6}$  mol;  $i\text{PrOH}$  =  $1.0 \cdot 10^{-5}$  mol; L-LA =  $1.0 \cdot 10^{-3}$  mol (200 eq, i.e. 100 eq/Zn). <sup>b</sup>Determined by <sup>1</sup>H NMR spectral data.

## Ring-Opening Polymerization of $\epsilon$ -caprolactone

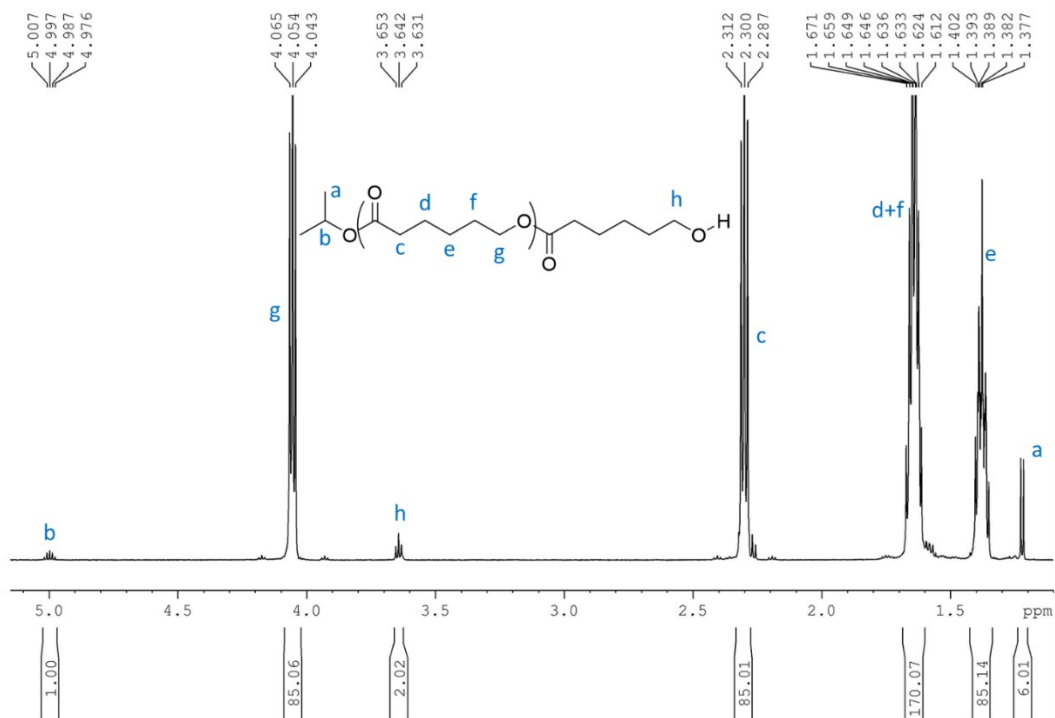

**Figure S12.**  $^1\text{H}$  NMR spectrum (600 MHz,  $\text{CDCl}_3$ , 298K) of PCL (run 17 in Table 2).

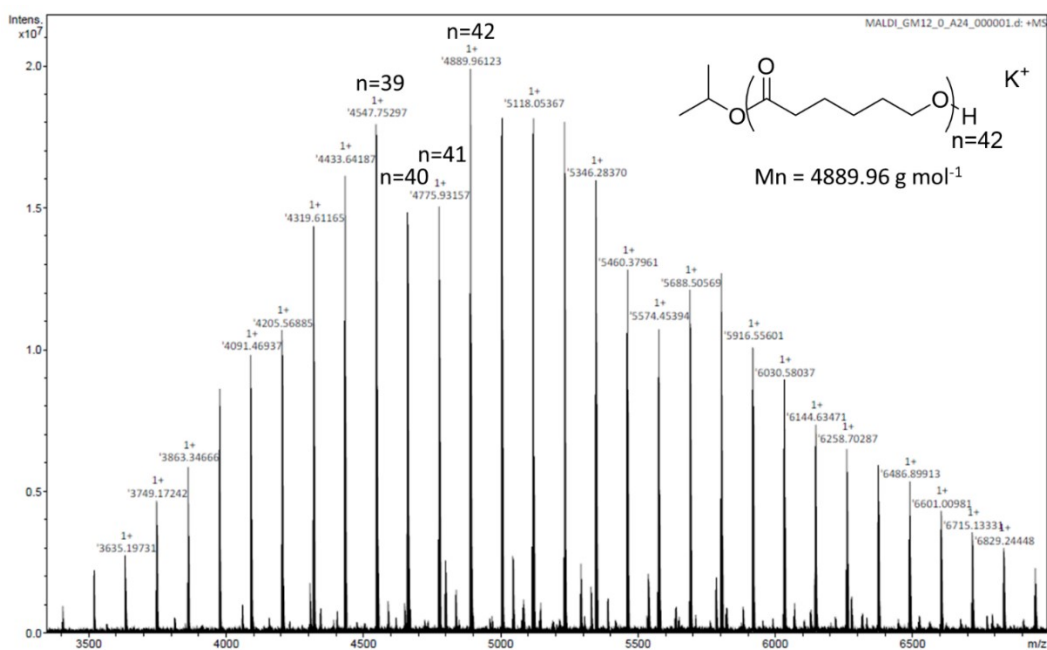

**Figure S13.** MALDI-FT-ICR spectrum of PCL (run 17, Table 2).

## Ring-Opening COPolymerization of phthalic anhydride and cyclohexene oxide

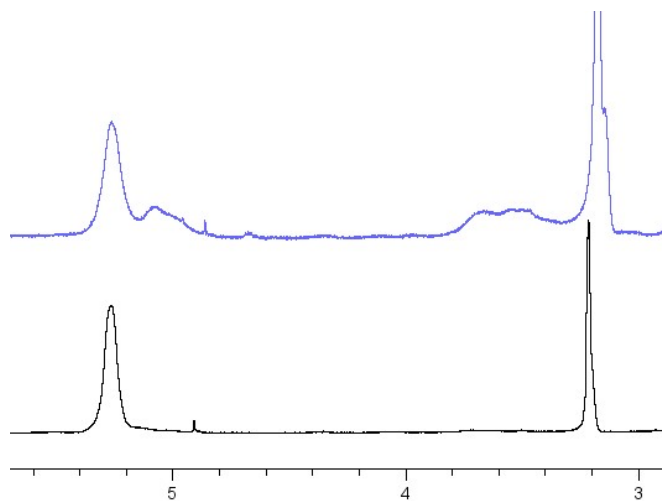

**Figure S14.** <sup>1</sup>H NMR spectra (300 MHz, CDCl<sub>3</sub>, 298K) of the sampling of the reaction mixtures during two CHO/PA ROCOP experiments (blue spectrum: run 20 in Table 3, black spectrum: run 22 in Table 3).

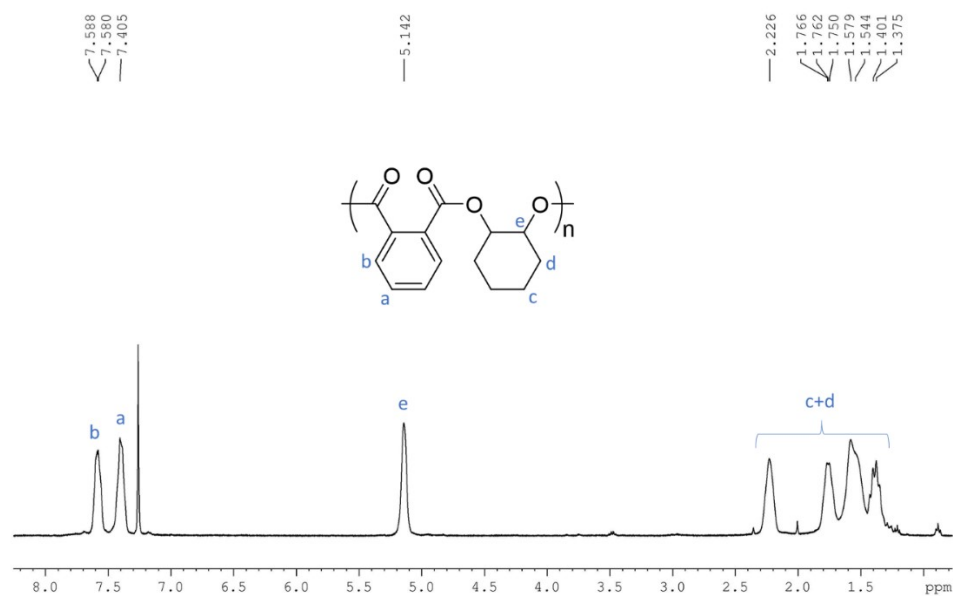

**Figure S15.** <sup>1</sup>H NMR spectrum (600 MHz, CDCl<sub>3</sub>, 298K) of a P(CHO-PA) isolated sample (run 24 in Table 3).
